# Supplementary material for: Quality Attributes and Sensory Acceptance of Different Botanical Coffee Co-Products
Source: MDPI journal article supplement (doi:10.3390/foods12142675), 2023-07-11
Supplement: s1 [file s1]

**Figure S1** Picture of analyzed samples (cascara- coffee husks)

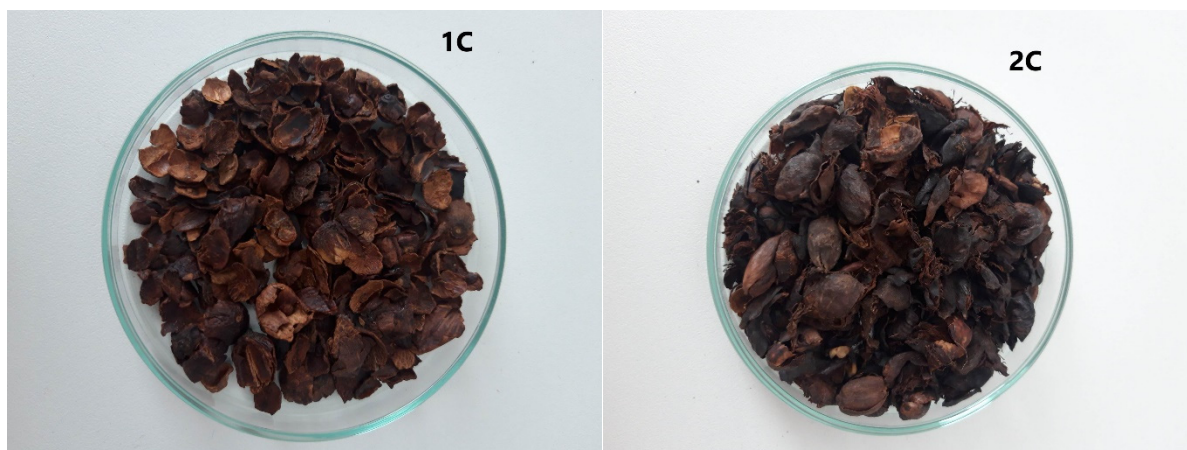

Note: 1C cascara *Coffea arabica*; 2C cascara *Coffea canephora*

**Figure S2** Picture of analyzed samples (silverskin- thin layer)

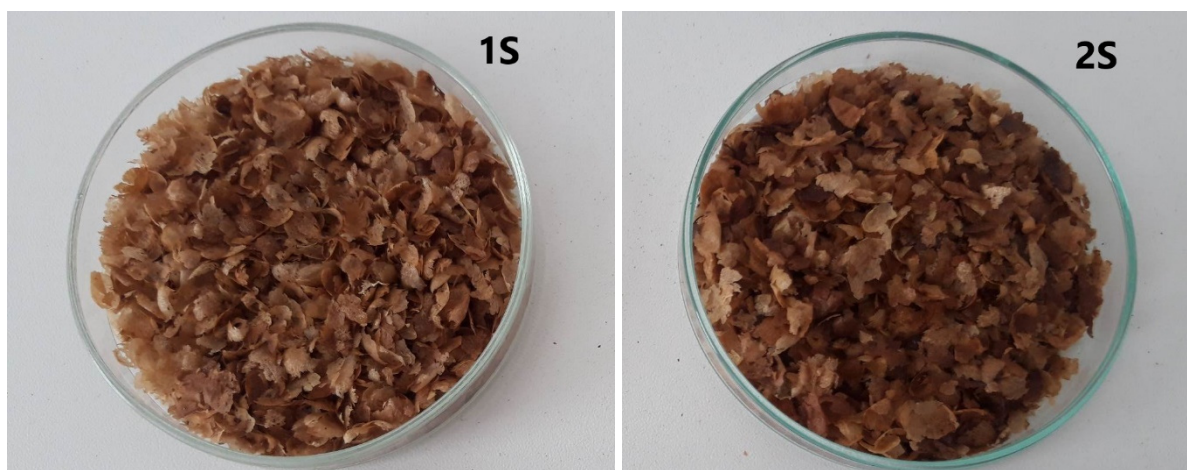

Note: 1S silverskin *Coffea arabica*; 1S silverskin *Coffea canephora*

**Figure S3** Chromatograms of fatty acids measurements by GC-FID (cascara- coffee husks)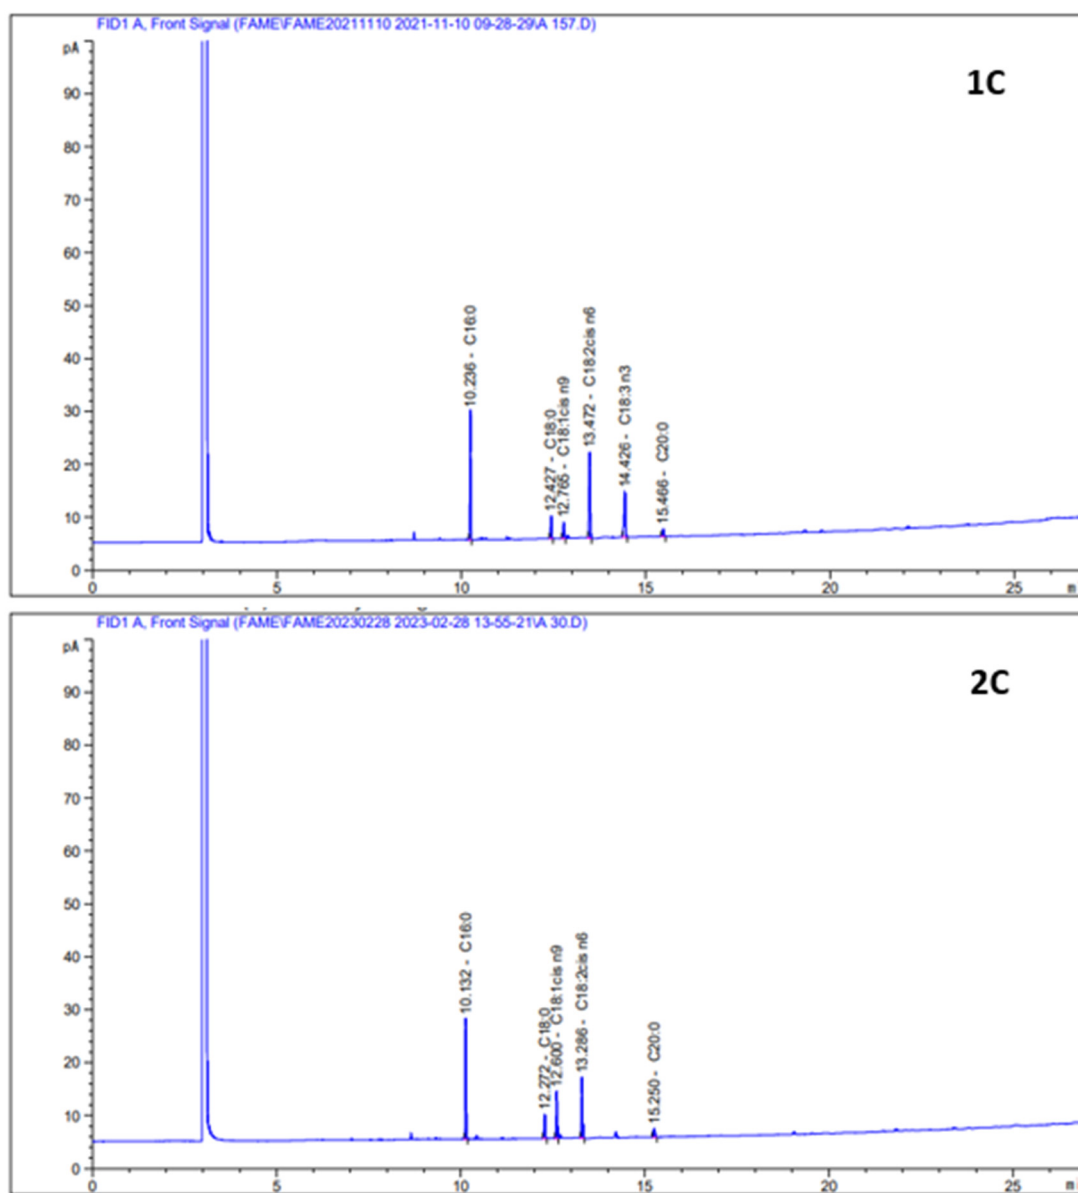

Note: 1C cascara *Coffea arabica*; 2C cascara *Coffea canephora*

**Figure S4** Chromatograms of fatty acids measurements by GC-FID (silverskin- thin layer)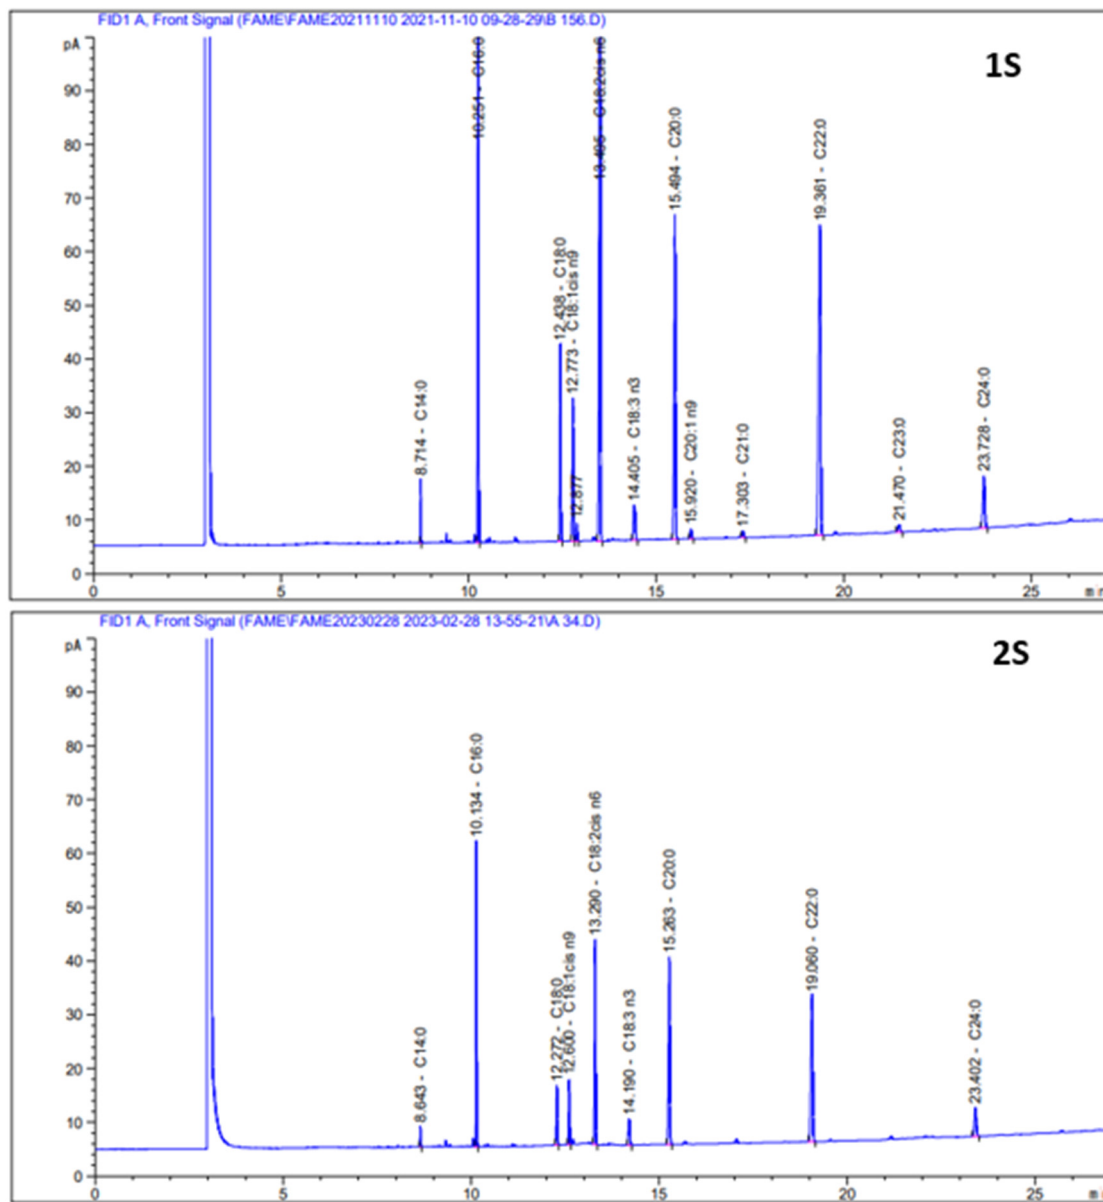

Note: 1S silverskin *Coffea arabica*; 2S silverskin *Coffea canephora*

**Table S1** Profile of fatty acids determined by GC-FID.

| Fatty acids (%)                                | Samples |        |        |        |
|------------------------------------------------|---------|--------|--------|--------|
|                                                | 1S      | 2S     | 1C     | 2C     |
| butyric acid                                   | 0.000   | 0.000  | 0.000  | 0.000  |
| caproic acid                                   | 0.000   | 0.000  | 0.000  | 0.000  |
| caprylic acid                                  | 0.000   | 0.000  | 0.000  | 0.000  |
| capric acid                                    | 0.000   | 0.000  | 0.000  | 0.000  |
| undecanoic acid                                | 0.000   | 0.000  | 0.000  | 0.000  |
| lauric acid                                    | 0.000   | 0.000  | 0.000  | 0.000  |
| tridecanoic acid                               | 0.000   | 0.000  | 0.000  | 0.000  |
| myristic acid                                  | 1.033   | 0.942  | 0.000  | 0.000  |
| myristoleic acid                               | 0.000   | 0.000  | 0.000  | 0.000  |
| pentadecanoic acid                             | 0.000   | 0.000  | 0.000  | 0.000  |
| cis-10-pentadecenoic acid                      | 0.000   | 0.000  | 0.000  | 0.000  |
| palmitic acid                                  | 25.434  | 18.353 | 31.533 | 36.195 |
| palmitoleic acid                               | 0.000   | 0.000  | 0.000  | 0.000  |
| heptadecanoic acid                             | 0.000   | 0.000  | 0.000  | 0.000  |
| cis-10-heptadecenoic acid                      | 0.000   | 0.000  | 0.000  | 0.000  |
| stearic acid                                   | 6.146   | 4.889  | 7.724  | 10.322 |
| elaidic acid                                   | 0.000   | 0.000  | 0.000  | 0.000  |
| oleic acid                                     | 4.706   | 5.494  | 5.553  | 19.449 |
| unidentified                                   | 0.553   | 0.000  | 0.000  | 0.000  |
| linolelaidic acid                              | 0.000   | 0.000  | 0.000  | 0.000  |
| unidentified                                   | 0.000   | 0.000  | 0.000  | 0.000  |
| linoleic acid                                  | 24.788  | 19.518 | 31.181 | 29.116 |
| $\gamma$ -linolenic acid                       | 0.000   | 0.000  | 0.000  | 0.000  |
| $\alpha$ -linolenic acid                       | 2.018   | 3.222  | 20.729 | 0.000  |
| arachidic acid                                 | 13.701  | 21.572 | 3.281  | 4.919  |
| cis-11-eicosenoic acid                         | 0.402   | 0.000  | 0.000  | 0.000  |
| cis-11,14-eicosadienoic acid                   | 0.000   | 0.000  | 0.000  | 0.000  |
| heneicosanoic acid                             | 0.280   | 0.000  | 0.000  | 0.000  |
| cis-8,11,14-eicosatrienoic acid                | 0.000   | 0.000  | 0.000  | 0.000  |
| arachidonic acid                               | 0.000   | 0.000  | 0.000  | 0.000  |
| cis-11,14,17-eicosatrienoic acid               | 0.000   | 0.000  | 0.000  | 0.000  |
| cis-5,8,11,14,17-eicosapentaenoic acid (EPA)   | 0.000   | 0.000  | 0.000  | 0.000  |
| behenic acid                                   | 17.463  | 21.294 | 0.000  | 0.000  |
| erucic acid                                    | 0.000   | 0.000  | 0.000  | 0.000  |
| cis-13,16-docosadienoic acid                   | 0.000   | 0.000  | 0.000  | 0.000  |
| tricosanoic acid                               | 0.413   | 0.000  | 0.000  | 0.000  |
| unidentified                                   | 0.000   | 0.000  | 0.000  | 0.000  |
| unidentified                                   | 0.000   | 0.000  | 0.000  | 0.000  |
| lignoceric acid                                | 3.064   | 4.717  | 0.000  | 0.000  |
| unidentified                                   | 0.000   | 0.000  | 0.000  | 0.000  |
| nervonic acid                                  | 0.000   | 0.000  | 0.000  | 0.000  |
| cis-4,7,10,13,16,19-docosahexaenoic acid (DHA) | 0.000   | 0.000  | 0.000  | 0.000  |

Note: 1S silverskin *Coffea arabica*; 2S silverskin *Coffea canephora*, 1C cascara *Coffea arabica*; 2C cascara *Coffea canephora*

**Table S2** Sensory analyses of coffee co-products

| Category | Appearance<br>(color) | Aroma               | Taste              | Coffee<br>after taste | Tea after<br>taste | Acidity            | Bitterness         | General<br>impression |
|----------|-----------------------|---------------------|--------------------|-----------------------|--------------------|--------------------|--------------------|-----------------------|
| 1S       | 3.500 <sup>a</sup>    | 5.167 <sup>ab</sup> | 3.417 <sup>a</sup> | 5.667 <sup>b</sup>    | 3.417 <sup>a</sup> | 3.667 <sup>a</sup> | 4.500 <sup>a</sup> | 3.333 <sup>a</sup>    |
| 2S       | 6.833 <sup>b</sup>    | 6.500 <sup>b</sup>  | 4.833 <sup>a</sup> | 6.417 <sup>b</sup>    | 3.000 <sup>a</sup> | 3.750 <sup>a</sup> | 5.000 <sup>a</sup> | 5.083 <sup>a</sup>    |
| 1C       | 5.167 <sup>ab</sup>   | 5.167 <sup>ab</sup> | 4.250 <sup>a</sup> | 3.667 <sup>a</sup>    | 6.083 <sup>b</sup> | 6.000 <sup>b</sup> | 4.167 <sup>a</sup> | 5.250 <sup>a</sup>    |
| 2C       | 5.500 <sup>ab</sup>   | 3.417 <sup>a</sup>  | 2.583 <sup>a</sup> | 2.833 <sup>a</sup>    | 4.333 <sup>a</sup> | 3.833 <sup>a</sup> | 5.083 <sup>a</sup> | 3.833 <sup>a</sup>    |

Note: a, b = groups within a column with different superscripts differ significantly at  $p \leq 0.05$ ; 1S silverskin *Coffea arabica*; 2S silverskin *Coffea canephora*; 1C cascara *Coffea arabica*; 2C cascara *Coffea canephora*
